# Supplementary material for: Effect of a patient-centered hypertension delivery strategy on all-cause mortality: Secondary analysis of SEARCH, a community-randomized trial in rural Kenya and Uganda
Source: PubMed Central journal article supplement (PMC8489716; doi:10.1371/journal.pmed.1003803), 2021-09-20
Supplement: pmed.1003803.s002.pdf [file pmed.1003803.s002.pdf]

# SEARCH Hypertension Diagnosis and Treatment Algorithms

## Hypertension Diagnosis Algorithm

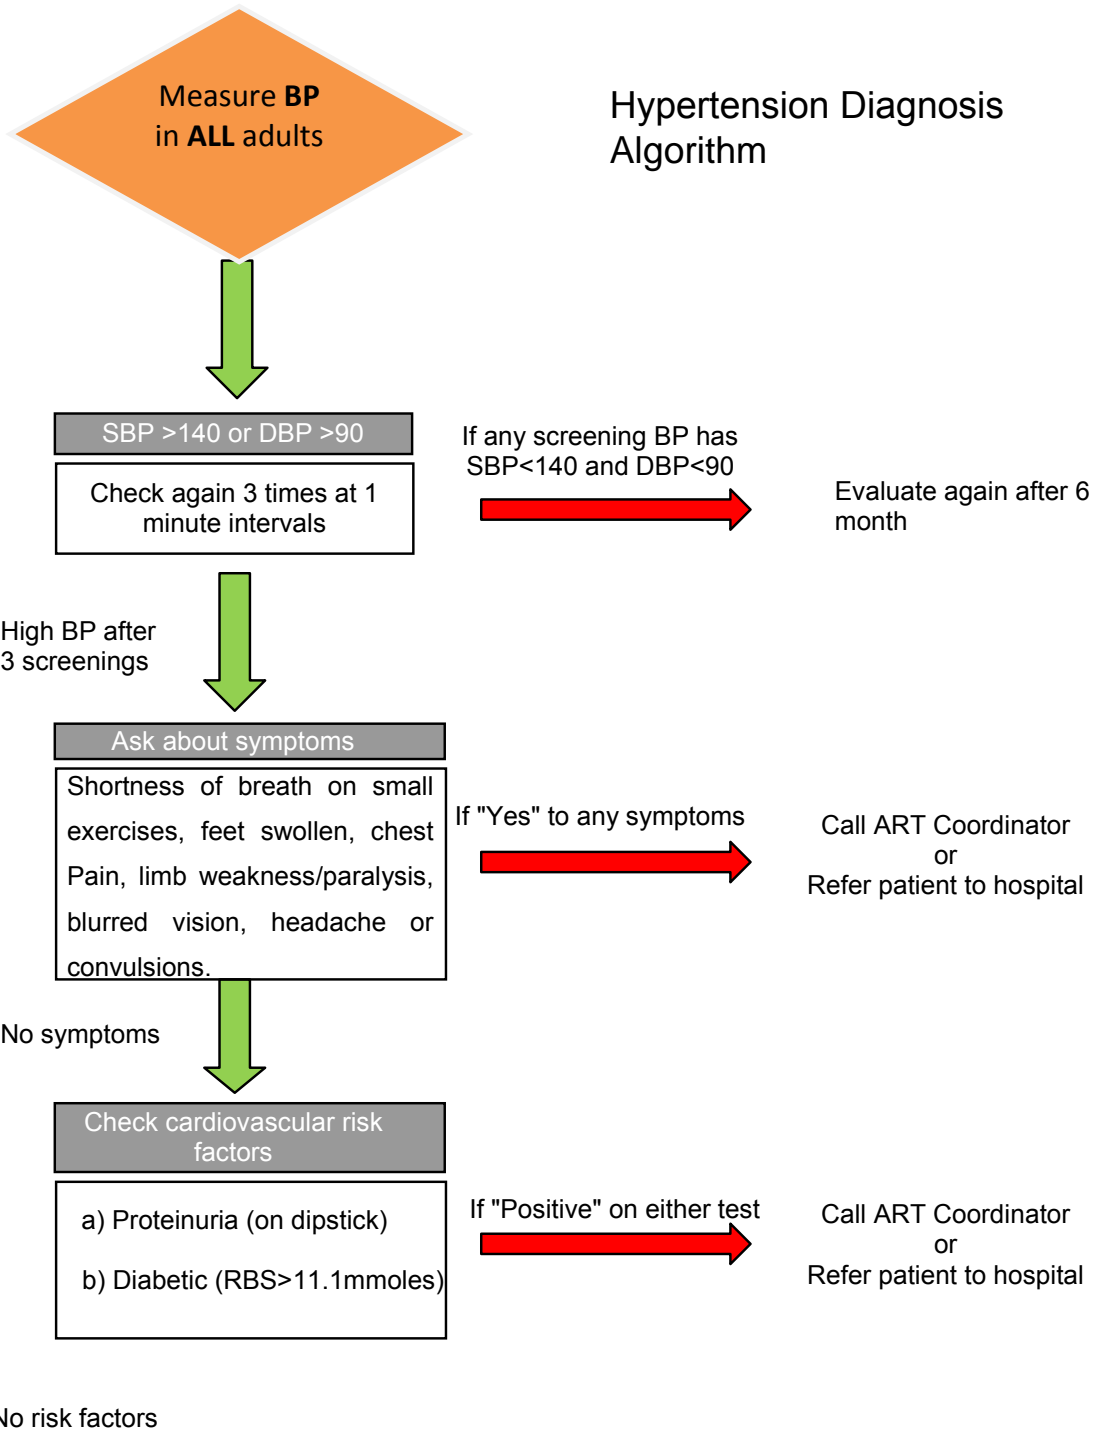

SBP 140-159  
and/or  
DBP 90-99

3-month trial of **lifestyle changes**:

Weight reduction, increase physical exercise, decrease dietary salt intake, decrease alcohol consumption, stop smoking promote fresh fruits and vegetables intake, fatty food limitation

**Follow up in 3 months** - If BP remains high then start medications

SBP 160-179  
and/or  
DBP 100-109

**Lifestyle changes**:

Weight reduction, increase physical exercise, decrease dietary salt intake, decrease alcohol consumption, stop smoking, promote fresh fruits and vegetables intake, fatty food limitation

**PLUS**

**Medications**

(Follow treatment algorithm)

SBP >180  
or  
DBP > 110

Call ART Coordinator  
or  
Refer patient to hospital

# Hypertension Treatment Algorithm

Initial medication regimen

**Bendroflumethiazide 5mg daily**

Follow-up in **4 weeks**

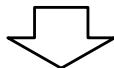

Target BP not achieved?

Increase

**Bendroflumethiazide 10mg**

Follow-up in **4 weeks**

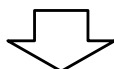

Target BP not achieved?

**Bendroflumethiazide 10 mg +  
Nifedipine 20 mg BID**

Follow-up in **4 weeks**

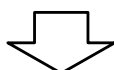

Target BP not achieved?

**Bendroflumethiazide 10 mg  
+ Nifedipine 20 mg BID +  
Add Captopril 25 mg BID**

Follow-up in **4 weeks**

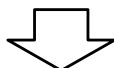

**Call ART Coordinator  
or  
Refer patient to the hospital**

## **BP GOALS**

**Age <60 or TOD: SBP <140 and DBP <90**

**Age ≥60: SBP <150 and DBP <90**

**TARGET BP  
ACHIEVED?**

Prescribe same  
treatment and follow  
up every 3 months

### **Measure BP & weight at each visit**

#### **Medication Adherence:**

**Always** check for drug adherence **at each visit**. Ask whether patient has **taken medication on each of the last three days**. Provide **counseling** if patient has **missed any dose** in the last three days.

#### **Lifestyle and Behavior**

**Review life style and Behavior**. Provide Counseling if still present

#### **Medication Tolerability:**

If patient is having **side effects**, change to another medication. Alternatively, call ART coordinator or refer patient to hospital

#### Key

BID-Twice a day; SB -Systolic; DBP-Diastolic BP;  
TOD-target organ damage (Heart failure, kidney failure, stroke, myocardial infarction etc)
