# Supplementary material for: Effect of a patient-centered hypertension delivery strategy on all-cause mortality: Secondary analysis of SEARCH, a community-randomized trial in rural Kenya and Uganda
Source: PubMed Central journal article supplement (PMC8489716; doi:10.1371/journal.pmed.1003803), 2021-09-20
Supplement: pmed.1003803.s003.pdf [file pmed.1003803.s003.pdf]

Diabetes Diagnosis Algorithm

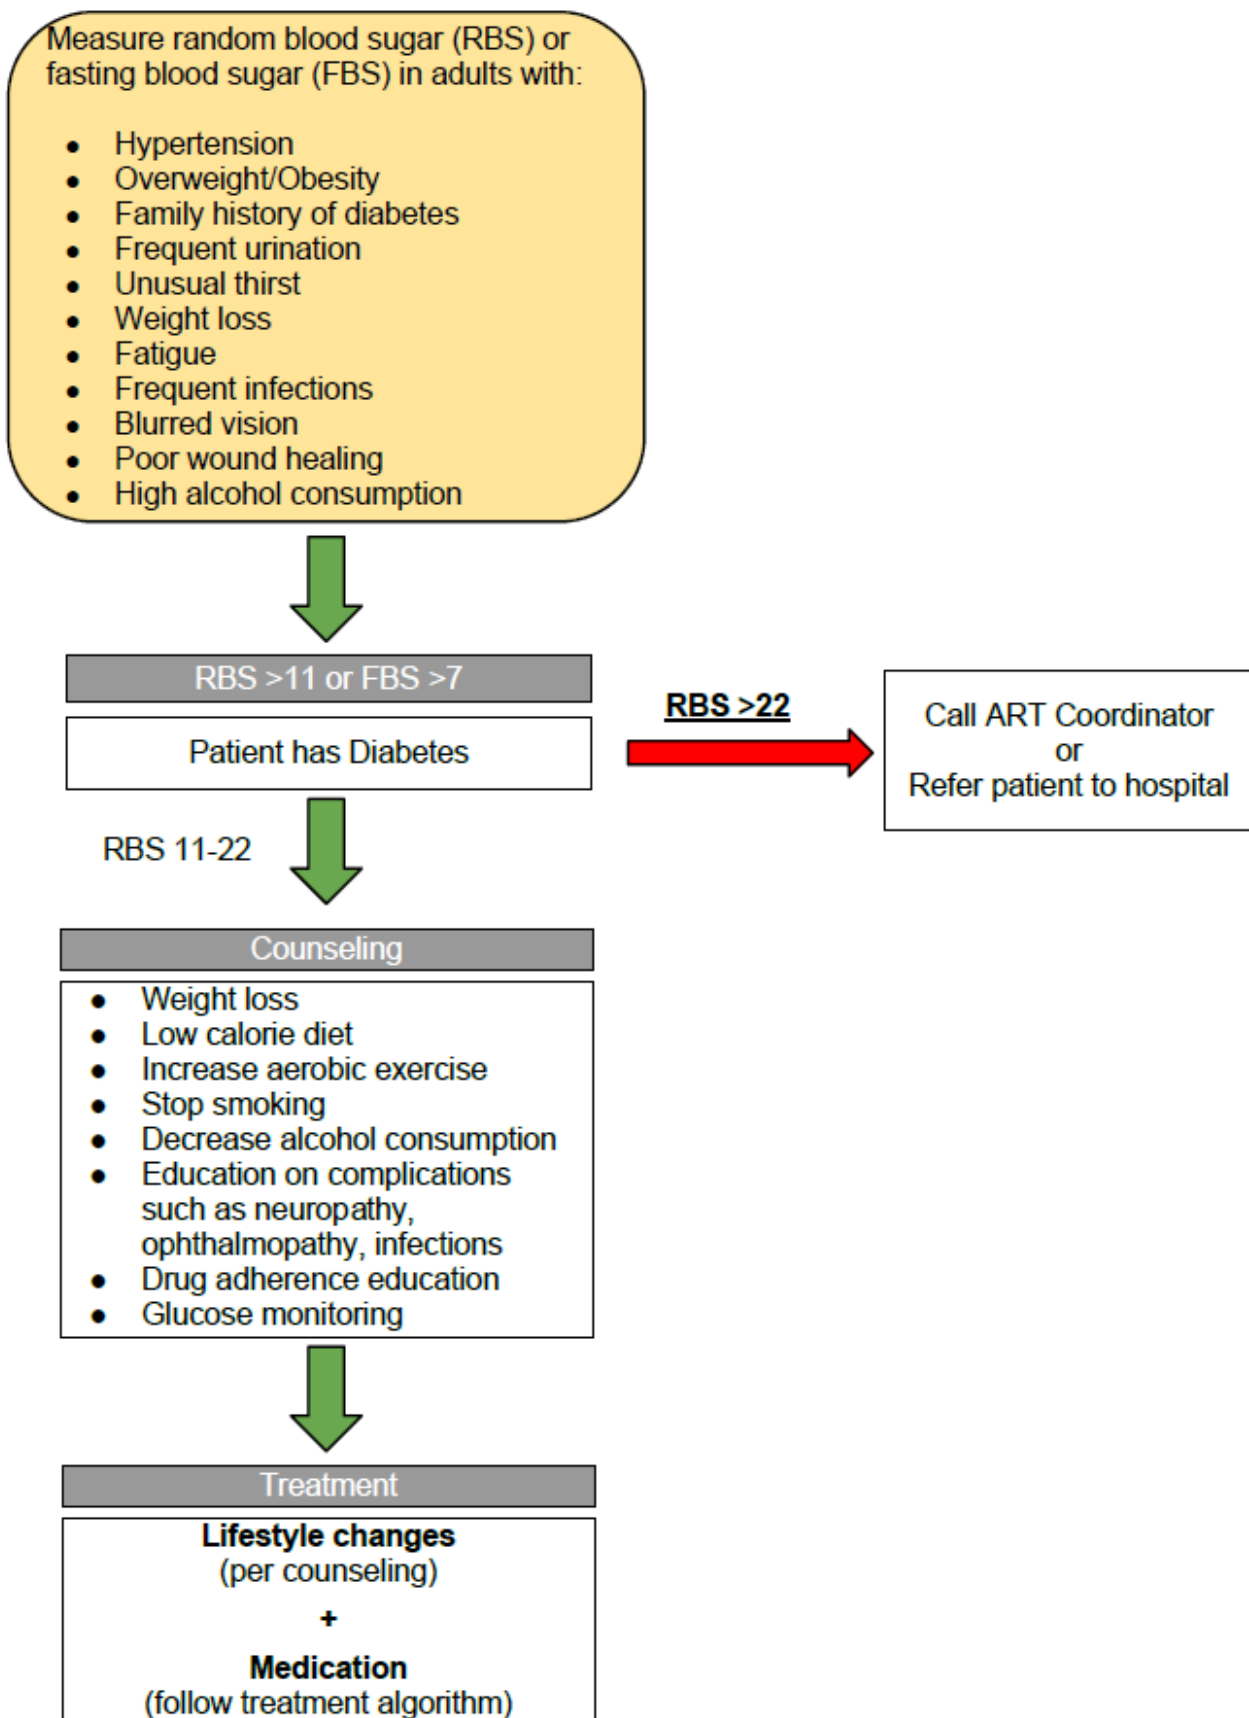

# Diabetes Treatment Algorithm

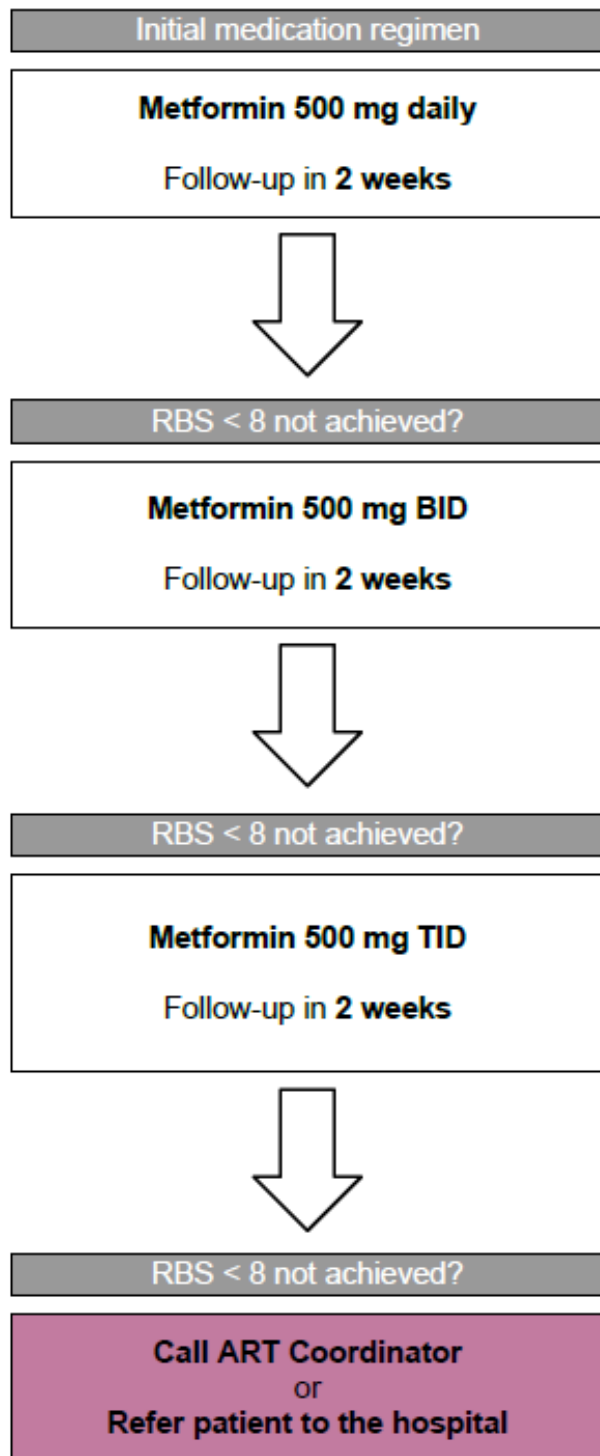

## Target Random Blood Sugar (RBS)

RBS < 8mmol/L

**TARGET RBS < 8  
ACHIEVED?**

Prescribe same  
treatment and followup  
every 3 months

## Measure RBS, BP & weight at each visit

### Medication Adherence:

**Always** check for drug adherence **at each visit**. Ask whether patient has **taken medication on each of the last three days**. Provide **counseling** if patient has **missed any dose** in the last three days.

### Medication Tolerability:

If patient is having **side effects**, call ART coordinator or refer patient to hospital
